# Supplementary material
Source: Springer Nature journal article supplement (https://www.springermedizin.de/resource/supplementary/13014_2011_464_MOESM3_ESM.pdf/9633480)

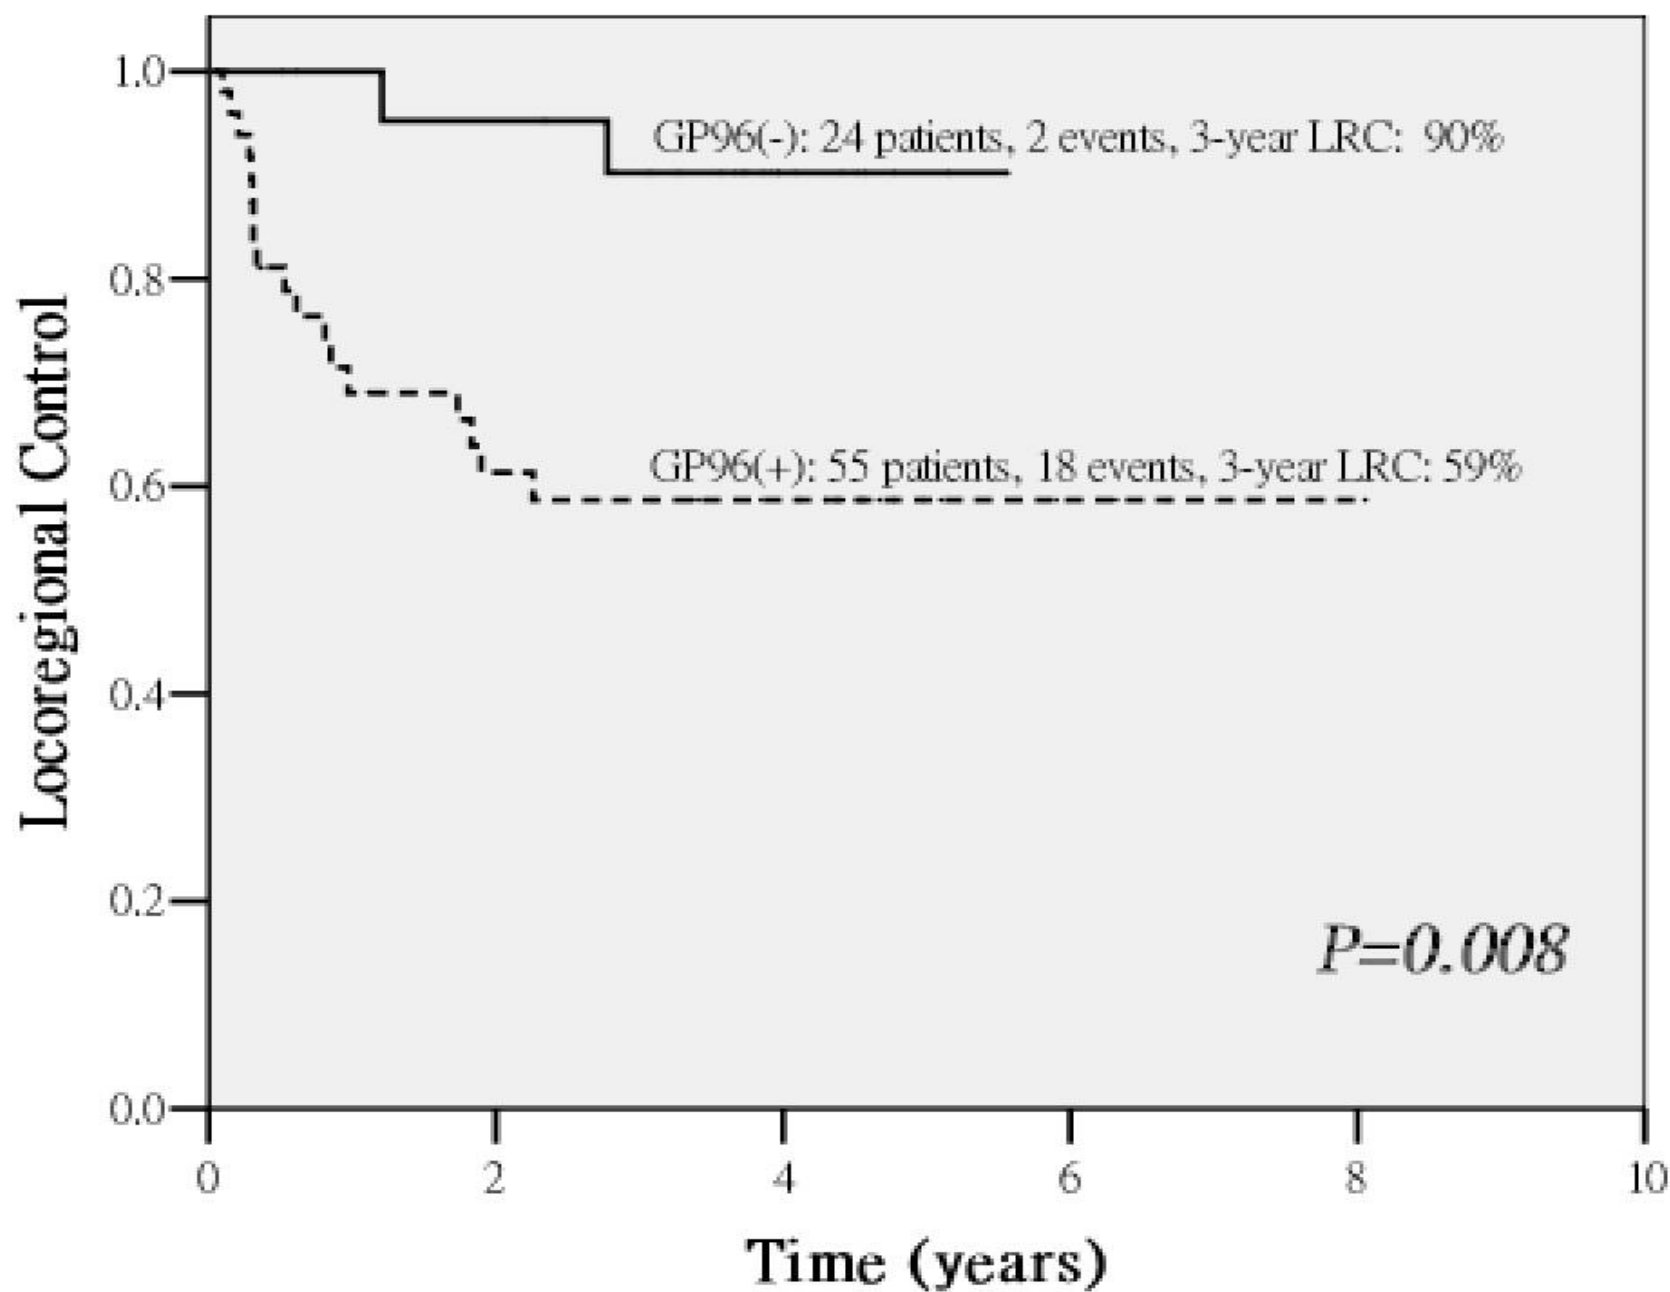

Supplement: MOESM3 [file 9633480]
